# Supplementary material for: Prediction of two-dimensional PC6 as a promising anode material for potassium-ion batteries
Source: Royal Society of Chemistry journal article supplement (doi:10.1039/c9cp05251h), 2019-01-01
Supplement: c9cp05251h1.pdf [file c9cp05251h1.pdf]

## Supporting Information for

# Prediction of Two-Dimensional $\text{PC}_6$ as a Promising Anode Material for Potassium-Ion Battery

Kaiying Dou, Yandong Ma,\* Ting Zhang, Baibiao Huang, and Ying Dai\*

School of Physics, State Key Laboratory of Crystal Materials, Shandong University, Shandan  
Street 27, Jinan 250100, China

\*Corresponding author: yandong.ma@sdu.edu.cn (Y.M.); daiy60@sina.com (Y.D.)

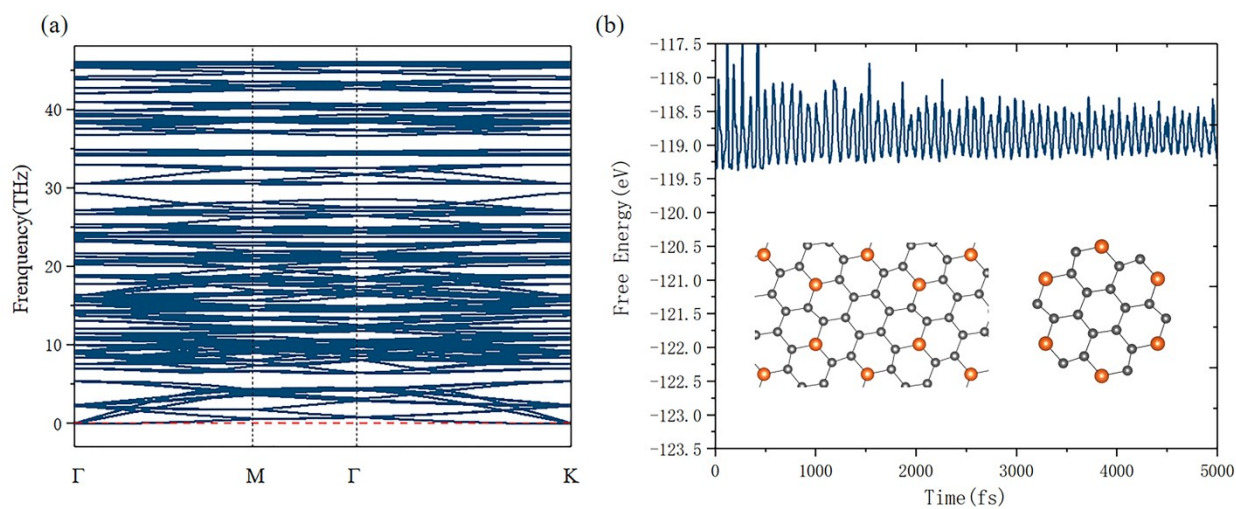

**Fig S1. (a) Calculated phonon band structure of the PC<sub>6</sub> monolayer. (b) AIMD simulation over 5ps at 300K.**

**Fig. S1** (a) Phonon spectrum of PC<sub>6</sub> monolayer. (b) Fluctuations of total energy with time obtained from MD simulation of PC<sub>6</sub> monolayer at 300 K. Insert in (b) is the snapshot of PC<sub>6</sub> monolayer at the end of MD simulation.

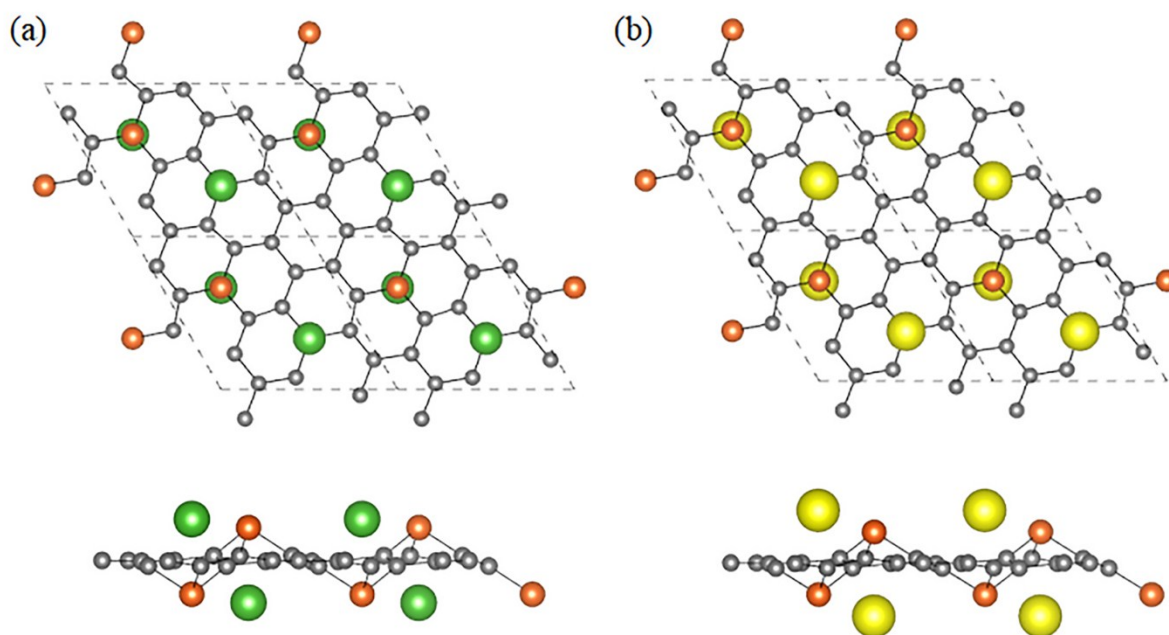

**Fig. S2** Adsorption structure of  $\text{PC}_6\text{Li}_1$  (a) and  $\text{PC}_6\text{Na}_1$  (b). Green balls indicate Li atoms and yellow balls indicate Na atoms.

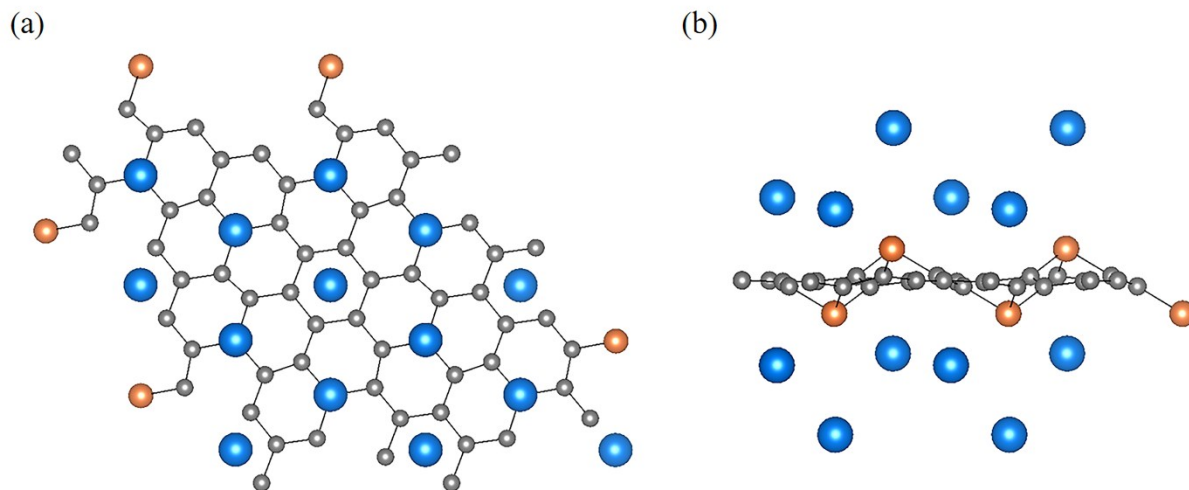

**Fig. S3** Crystal structure of  $\text{PC}_6$  monolayer with full K ions adsorption after AIMD simulations at 300 K for 3ps from top (a) and side (b) views. Blue balls indicate K atoms.

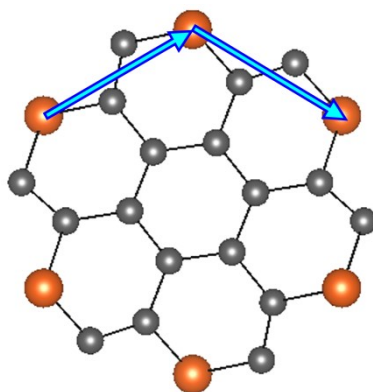

**Fig. S4** Schematic illustrations for the migration path **III** of K diffusion on the surface of  $\text{PC}_6$  monolayer. We investigate the diffusion path along the zigzag direction which is shown in **Fig. S4**. The corresponding diffusion barrier is estimated to be 0.97 eV, which is much higher than diffusion barriers along path **I** (0.27 eV) and path **II** (0.26 eV) shown in **Fig 3(a)**, indicating this path is not favorable.

**Table S1.** Adsorption energy ( $E_{ad}$ ), adsorption height ( $h$ ), and Bader charge analysis ( $E_b$ ) of  $PC_6$  monolayer with the adsorption of single K atom in different configurations.

| Site        | $E_{ad}$ (eV) | $h$ (Å) | $E_b$ (e) |
|-------------|---------------|---------|-----------|
| S1          | -1.34         | 1.20    | 0.891     |
| S4          | -1.12         | 1.55    | 0.899     |
| S6          | -0.44         | 2.96    | 0.860     |
| S5          |               | S4      |           |
| S2/S3/S7/S8 |               | S1      |           |

**Table S2.** Adsorption Energy ( $E_{ad}$ ) and adsorption Height ( $h$ ) of Li-Adsorbed  $PC_6$  and Na-adsorbed  $PC_6$  in different adsorption sites.

| Site        | $E_{ad}$ (eV) | $h$ (Å) | $E_{ad}$ (eV) | $h$ (Å) |
|-------------|---------------|---------|---------------|---------|
|             | Li-adsorption |         | Na-adsorption |         |
| S1          | -0.63         | 0.34    | -0.74         | 0.75    |
| S4          | -0.44         | 0.72    | -0.46         | 1.15    |
| S6          | 0.37          | 2.40    | 0.13          | 2.74    |
| S5          |               | S4      |               | S4      |
| S2/S3/S7/S8 |               | S1      |               | S1      |

---

**Table S3.** Adsorption energy ( $E_{\text{ad}}$ ) and adsorption height ( $h$ ) of two-layer K-adsorbed  $\text{PC}_6$  with the adsorption of single K atom for the third layer in different sites.

| Site | $E_{\text{ad}}$ (eV) | $h$ (Å) |
|------|----------------------|---------|
| S1   | 0.89                 | 3.42    |
| S4   | 0.51                 | 3.89    |
| S6   | -0.45                | 2.03    |
